# Supplementary material for: Mitochondrial DNA Variation in Peruvian Honey Bee (Apis mellifera L.) Populations Using the tRNAleu-cox2 Intergenic Region
Source: MDPI journal article supplement (doi:10.3390/insects12070641), 2021-07-14
Supplement: s1 [file s1]

Table S1. Geographical coordinates for sampling sites in three Peruvian regions.

| Region | Sampling sites | Latitude     | Longitude    |
|--------|----------------|--------------|--------------|
| Lima   | Barranca       | -10.69414582 | -77.69013187 |
|        | Coayllo        | -12.73032341 | -76.45966615 |
|        | Quilmaná       | -12,95545436 | -76,38696181 |
|        | Santa María    | -11,09434808 | -77,58587021 |
|        | Sayán          | -11,2340555  | -77,37451224 |
| Piura  | Chulucanas 1   | -4,985357156 | -80,16514518 |
|        | Chulucanas 2   | -5,120997583 | -80,19520977 |
|        | La Matanza 1   | -5,215620746 | -80,0926018  |
|        | La Matanza 2   | -5,371220445 | -80,02215688 |
|        | Piura          | -5,175398077 | -80,7074544  |
| Junín  | La Merced      | -11,0703574  | -75,33402035 |
|        | Perené 1       | -10,9023300  | -75,19011    |
|        | Perené 2       | -10,99490867 | -75,20002374 |
|        | San Ramón      | -11,15000226 | -75,38637896 |
|        | Vitoc          | -11,21033800 | -75,33533191 |

Table S2. Haplotype frequencies and sample sizes (on the third line) for each sampling site from Lima, Piura, and Junín.

|           | Lima     |         |          |             |       | Piura        |              |              |              |       | Junín     |          |          |           |       |
|-----------|----------|---------|----------|-------------|-------|--------------|--------------|--------------|--------------|-------|-----------|----------|----------|-----------|-------|
|           | Barranca | Coayllo | Quilmaná | Santa María | Sayán | Chulucanas 1 | Chulucanas 2 | La Matanza 1 | La Matanza 2 | Piura | La Merced | Perené 1 | Perené 2 | San Ramón | Vitoc |
| Haplotype | 42       | 38      | 36       | 39          | 35    | 38           | 31           | 14           | 52           | 31    | 32        | 36       | 29       | 35        | 24    |
| C1        | 0.905    | -       | 0.194    | 0.641       | 0.257 | -            | 0.258        | 0.071        | 0.096        | -     | -         | -        | -        | -         | -     |
| C2        | -        | -       | 0.056    | -           | -     | -            | -            | -            | -            | 0.032 | -         | -        | -        | -         | -     |
| C2c       | 0.048    | -       | -        | 0.205       | -     | -            | -            | -            | -            | -     | -         | -        | -        | -         | -     |
| C2j       | -        | 0.632   | -        | 0.051       | 0.314 | -            | 0.065        | -            | -            | -     | 0.25      | 0.028    | 0.069    | 0.143     | 0.208 |
| C2l       | -        | -       | -        | -           | -     | 0.079        | -            | -            | -            | -     | -         | -        | -        | -         | -     |
| C3        | -        | -       | 0.111    | -           | -     | -            | -            | -            | -            | -     | -         | -        | -        | -         | -     |
| M7b       | -        | -       | 0.056    | -           | -     | -            | -            | -            | -            | -     | -         | 0.028    | -        | -         | 0.083 |
| M7c       | -        | -       | -        | -           | -     | -            | -            | -            | -            | 0.032 | -         | -        | -        | -         | -     |
| A30       | -        | 0.342   | 0.111    | 0.077       | 0.029 | 0.421        | -            | 0.214        | 0.192        | 0.032 | -         | -        | -        | -         | -     |
| A30d      | -        | -       | 0.028    | -           | -     | -            | -            | -            | -            | -     | -         | -        | -        | -         | -     |
| A30e      | -        | -       | 0.028    | -           | -     | -            | -            | -            | -            | -     | -         | -        | -        | -         | -     |
| A4p       | -        | 0.026   | -        | 0.026       | 0.286 | 0.447        | 0.452        | 0.214        | 0.327        | 0.452 | 0.188     | 0.278    | 0.172    | 0.2       | 0.5   |
| A4q       | -        | -       | -        | -           | -     | 0.026        | -            | -            | -            | -     | -         | -        | -        | -         | -     |
| A4s       | -        | -       | -        | -           | -     | -            | -            | -            | -            | -     | 0.031     | -        | -        | -         | -     |
| A4t       | 0.048    | -       | 0.361    | -           | -     | -            | 0.161        | 0.143        | 0.192        | 0.258 | 0.344     | 0.583    | 0.586    | 0.057     | 0.208 |
| A4u       | -        | -       | -        | -           | -     | -            | -            | -            | -            | -     | -         | 0.028    | 0.069    | 0.029     | -     |
| A4v       | -        | -       | -        | -           | -     | -            | -            | -            | -            | -     | -         | -        | 0.034    | -         | -     |
| A4w       | -        | -       | -        | -           | -     | -            | -            | -            | -            | -     | -         | -        | 0.069    | -         | -     |
| A1        | -        | -       | -        | -           | -     | -            | 0.032        | 0.214        | 0.077        | 0.097 | 0.031     | -        | -        | 0.257     | -     |

|            |   |   |       |   |       |       |       |       |       |       |       |       |   |       |   |
|------------|---|---|-------|---|-------|-------|-------|-------|-------|-------|-------|-------|---|-------|---|
| <b>A1e</b> | - | - | -     | - | 0.114 | 0.026 | -     | 0.143 | 0.115 | 0.065 | 0.063 | 0.028 | - | 0.086 | - |
| <b>A1t</b> | - | - | 0.056 | - | -     | -     | -     | -     | -     | -     | -     | -     | - | -     | - |
| <b>A1u</b> | - | - | -     | - | -     | -     | -     | -     | -     | -     | 0.063 | -     | - | 0.229 | - |
| <b>A1w</b> | - | - | -     | - | -     | -     | -     | -     | -     | -     | -     | 0.028 | - | -     | - |
| <b>A65</b> | - | - | -     | - | -     | -     | 0.032 | -     | -     | 0.032 | 0.031 | -     | - | -     | - |
